# Supplementary material for: Positive effect of Fe3+ions on Bi2WO6, Bi2MoO6and BiVO4photocatalysis for phenol oxidation under visible light
Source: Royal Society of Chemistry journal article supplement (doi:10.1039/c9cy00855a), 2019-01-01
Supplement: c9cy00855a1.pdf [file c9cy00855a1.pdf]

## Supporting Information

# Positive effect of Fe<sup>3+</sup> ions on Bi<sub>2</sub>WO<sub>6</sub>, Bi<sub>2</sub>MoO<sub>6</sub> and BiVO<sub>4</sub> photocatalysis for phenol oxidation under visible light

Xubo Huang, Jianjun Zhao, Xianqiang Xiong, Shengwei Liu, and YiMing Xu \*

State Key Laboratory of Silicon Materials and Department of Chemistry, Zhejiang University, Hangzhou 310027, P.R. China

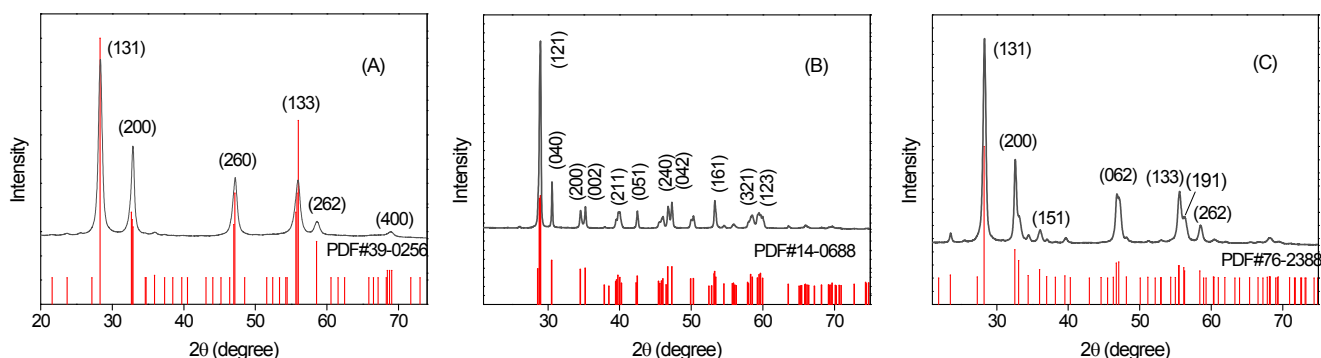

**Fig. S1** XRD patterns (black lines) and standard patterns (red bars) of (A) BiW, (B) BiMo, and (C) BiV.

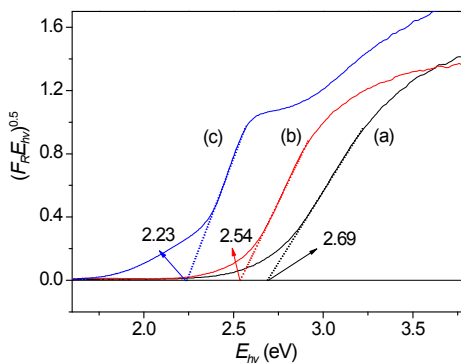

**Fig. S2** Tauc plots for (a) BiW, (b) BiMo, and (c) BiV, where  $F_R$  is Kubelka-Munk absorbance, and  $E_{hv}$  is light energy.

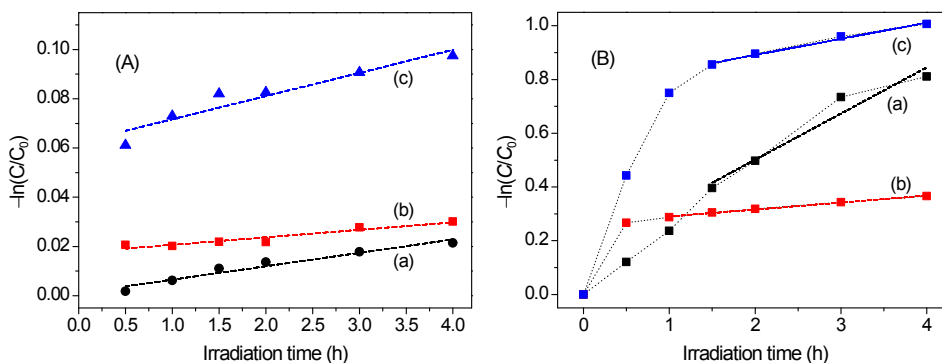

**Fig. S3** Plot of  $\ln(C/C_0)$  vs.  $t$  for phenol degradation on (a) BiW, (b) BiMo, and (c) BiV, (A) without, and (B) with Fe<sup>3+</sup>.

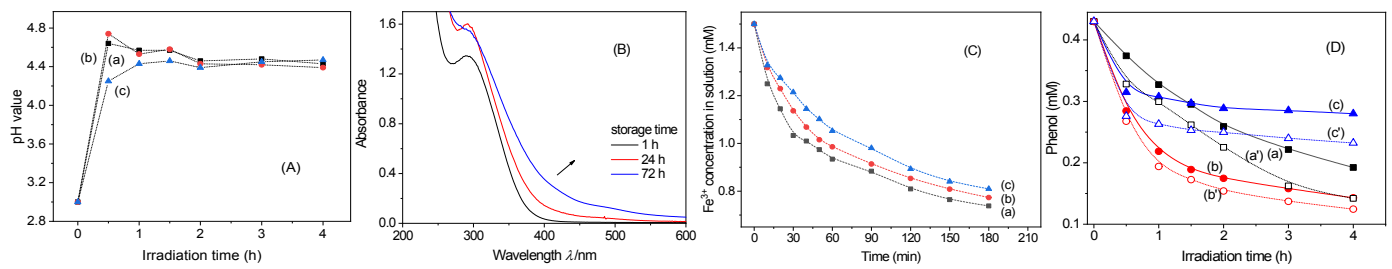

**Fig. S4** (A) pH change of the suspensions with irradiation time, during phenol degradation in presence of 1.5 mM  $\text{Fe}^{3+}$ . (B) Absorption spectra of 0.6 mM  $\text{Fe}^{3+}$  solution, where  $[\text{Fe}(\text{H}_2\text{O})_6]^{3+}$  is assigned at 246 nm and  $[\text{Fe}(\text{H}_2\text{O})_5(\text{OH})]^{2+}$  at 296 nm. (C) Time profiles of  $\text{Fe}^{3+}$  adsorption on solid in dark. (D) Time profiles of phenol degradation, obtained from the equilibrated suspensions of 0.5 h (solid symbols and lines) and 20 h (open symbols and dotted lines). All experiments were performed in aqueous solution at initial pH 3.0, with (a, a') BiW, (b, b') BiMo, and (c, c') BiV.

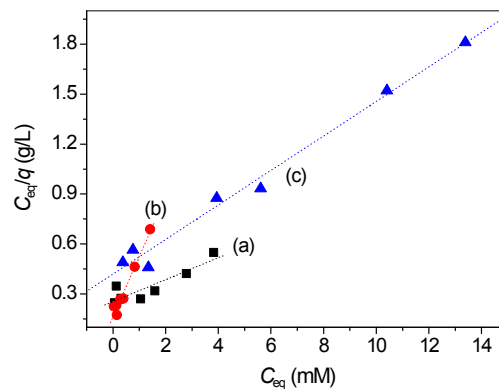

**Fig. S5** Plots of  $C_{\text{eq}}/q$  vs.  $C_{\text{eq}}$  for  $\text{Fe}^{3+}$  adsorption on (a) BiW, (b) BiMo, and (c) BiV (see details in Fig. 4A).

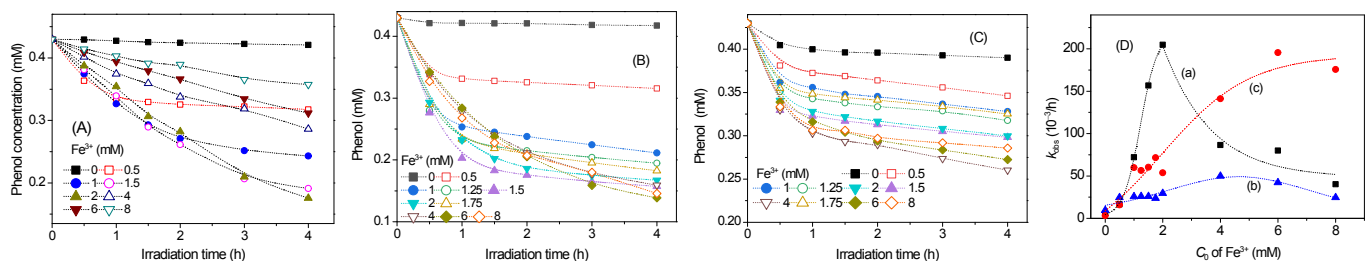

**Fig. S6** Time profiles for phenol degradation on (A) BiW, (B) BiMo, and (C) BiV, in presence of  $\text{Fe}^{3+}$  at different concentration ( $C_0$ ). (D) Rate constants of phenol degradation ( $k_{\text{obs}}$ ) obtained from slow process of (a) BiW, (b) BiMo, and (c) BiV

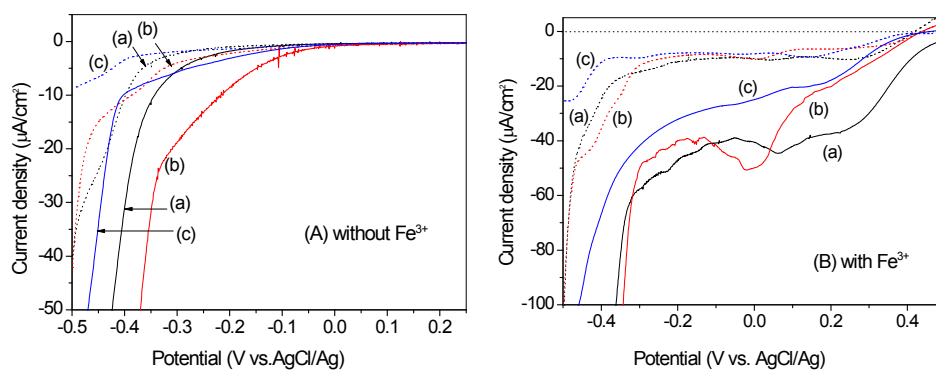

**Fig. S7** Current-voltage curves of (a) BiW, (b) BiMo, and (c) BiV in 0.5 M NaClO<sub>4</sub> at pH 3.0, under N<sub>2</sub> (dotted lines) or air (solid lines), (A) without Fe<sup>3+</sup>, and (B) with 1.5 mM Fe<sup>3+</sup>.
